# Supplementary material
Source: PubMed Central journal article supplement (PMC2681804)
Supplement: supp_191_9_2934__1.pdf [file supp_191_9_2934__1.pdf]

# concatenate

*atpD*, *gapA*, *guaA*, *mutM*, *nuoD*, *ppsA*, *recA*

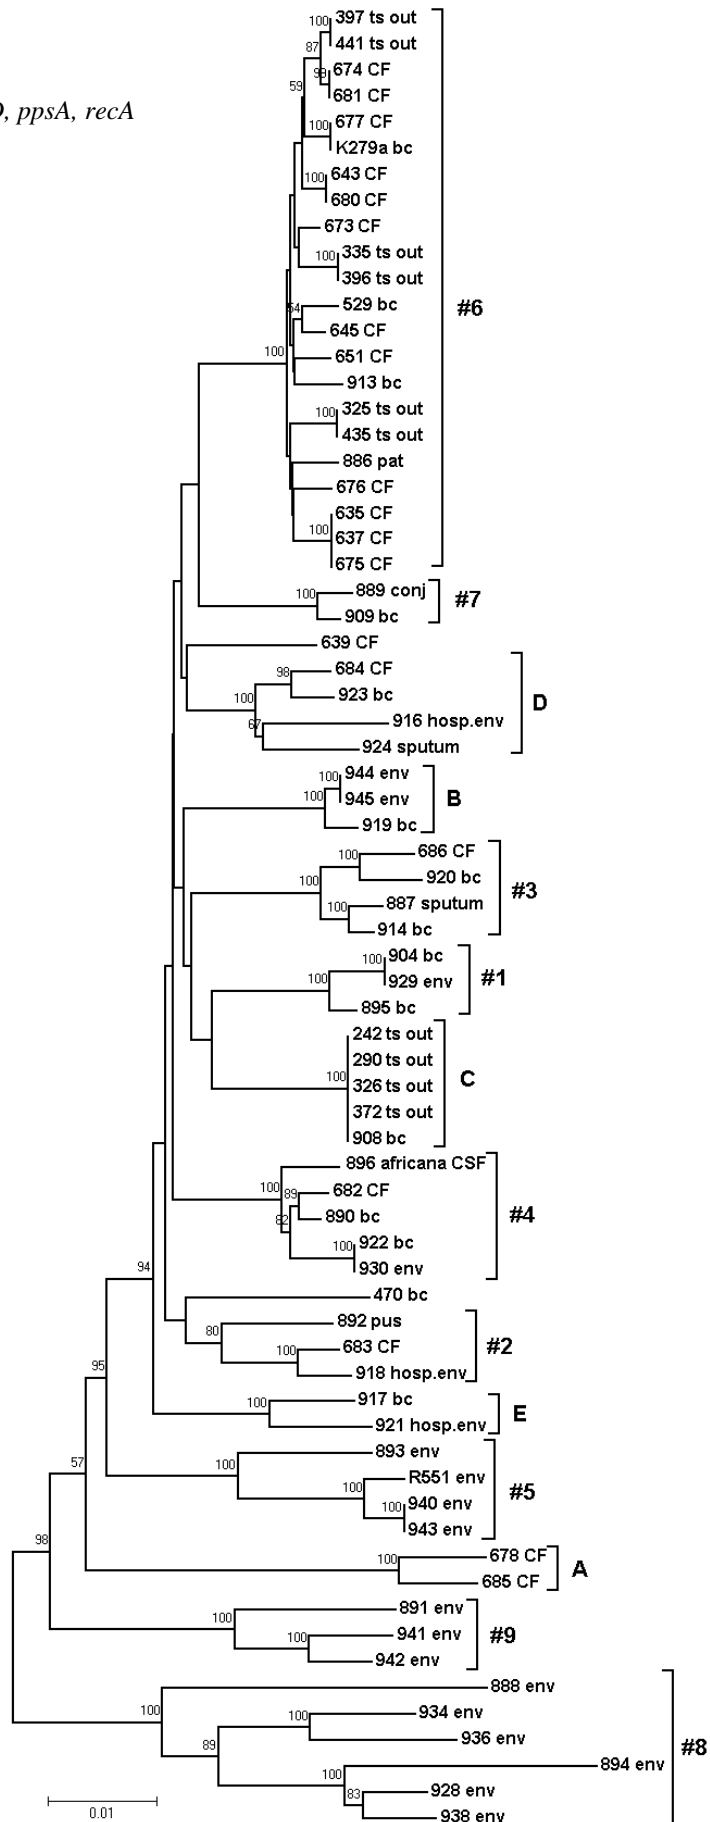

*atpD*

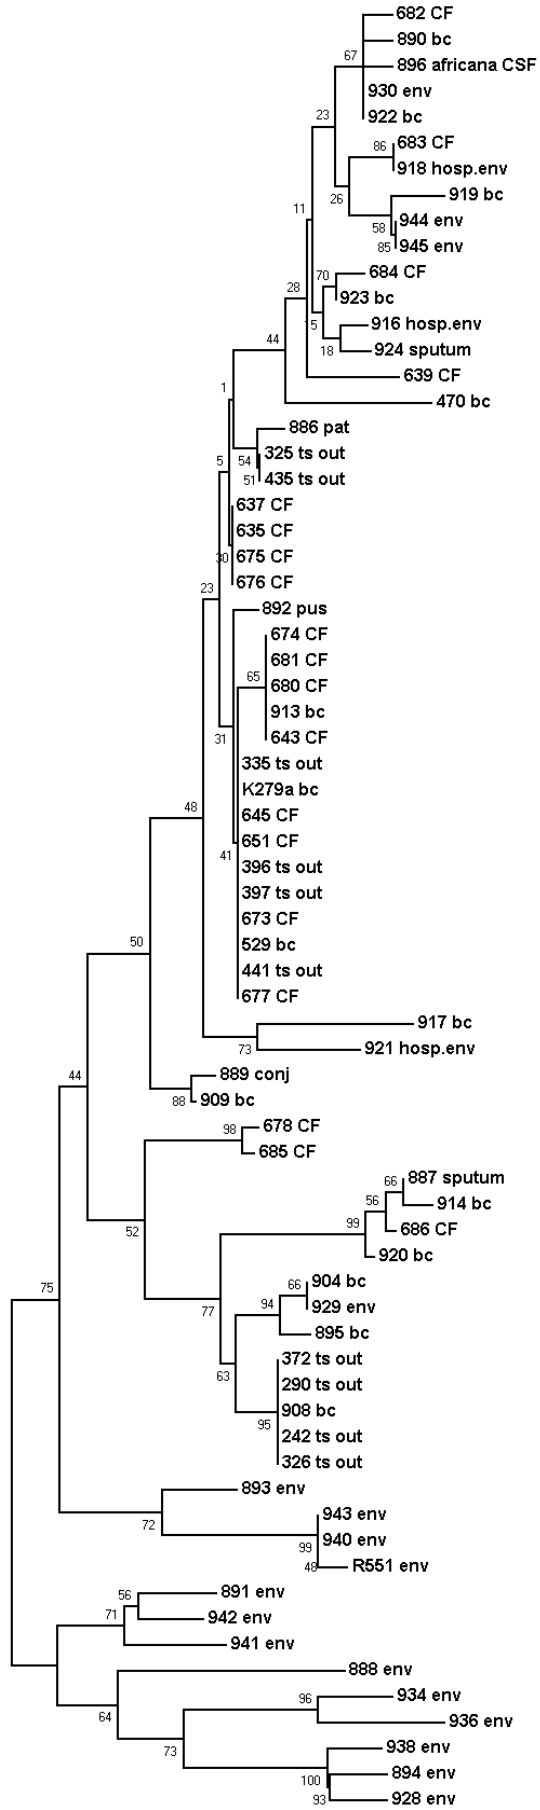

0.005

# gapA

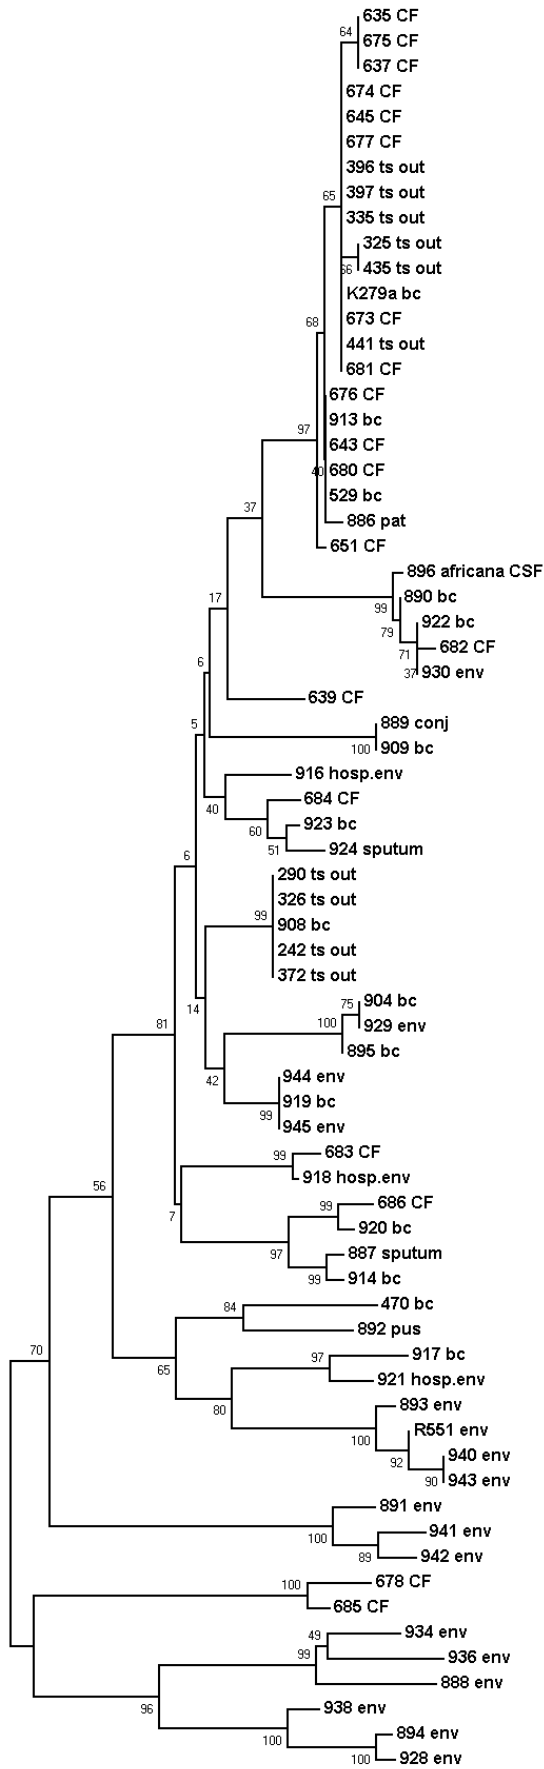

*guaA*

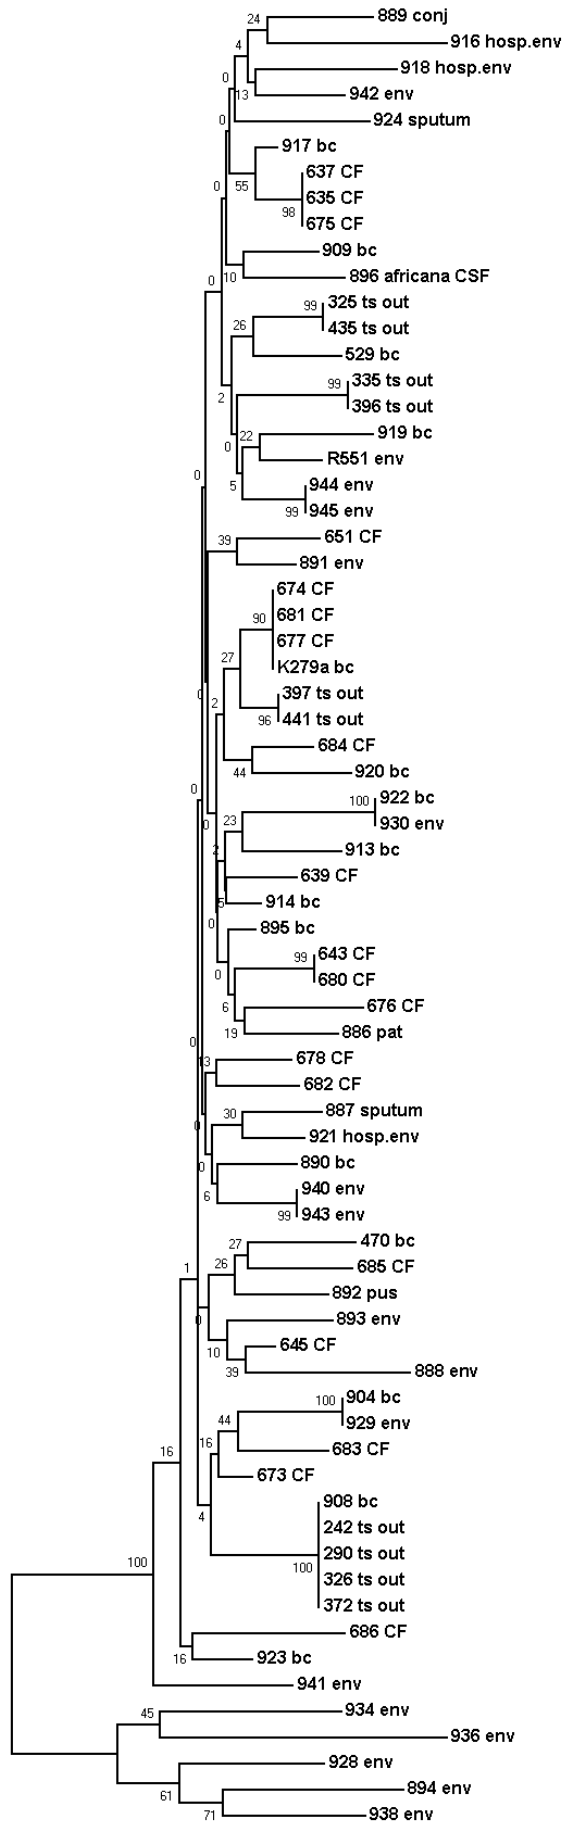

0.005

*mutM*

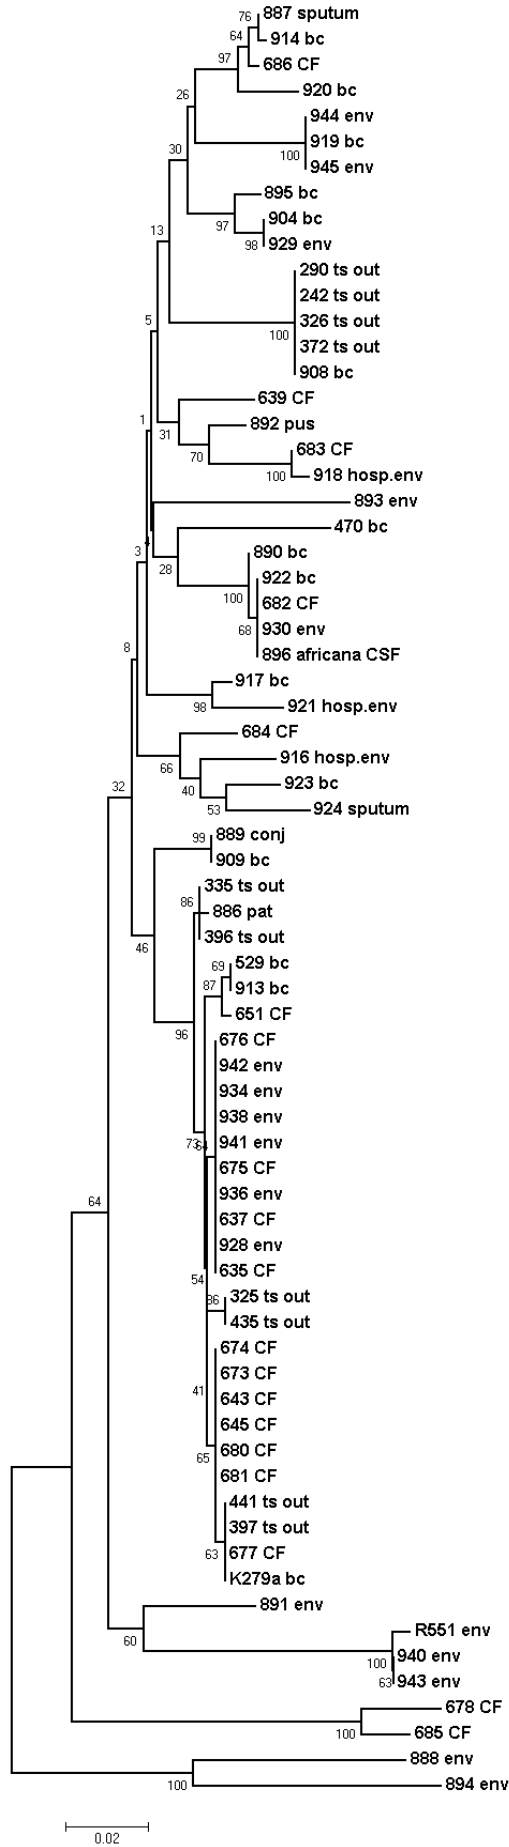

# *nuoD*

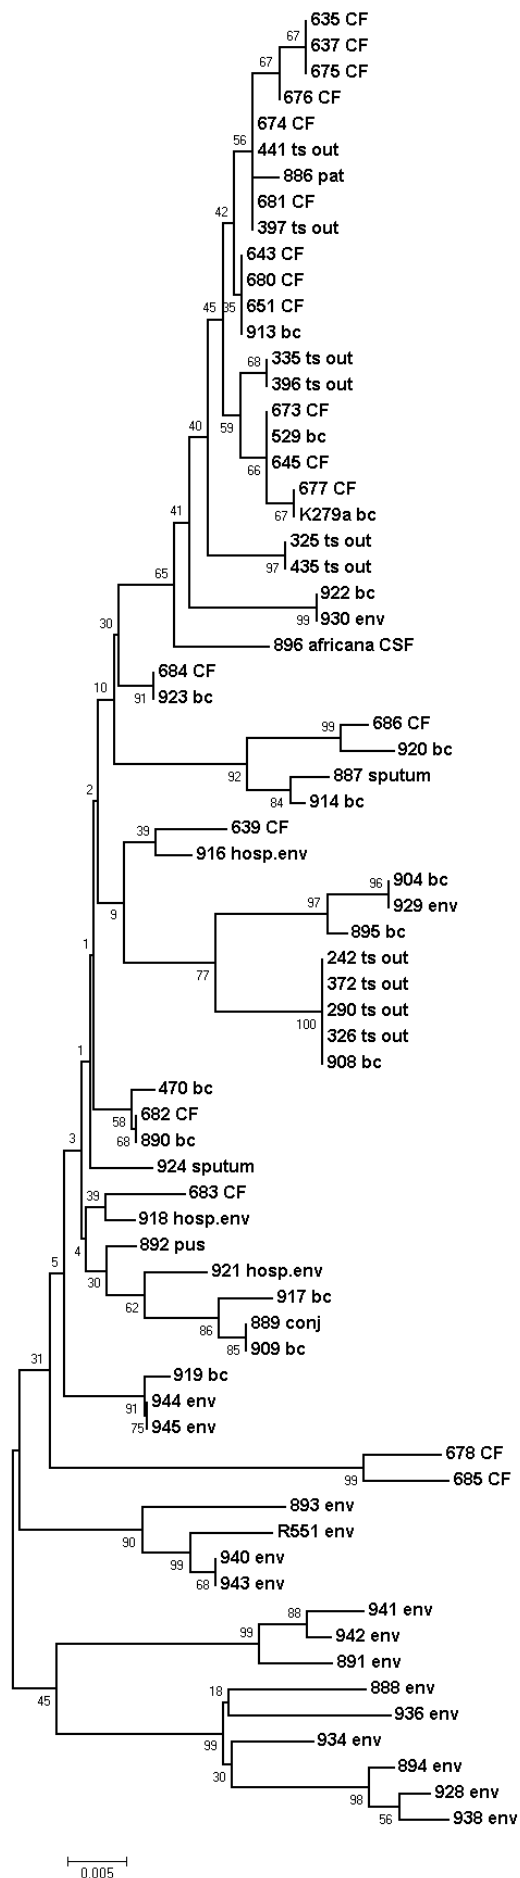

*ppsa*

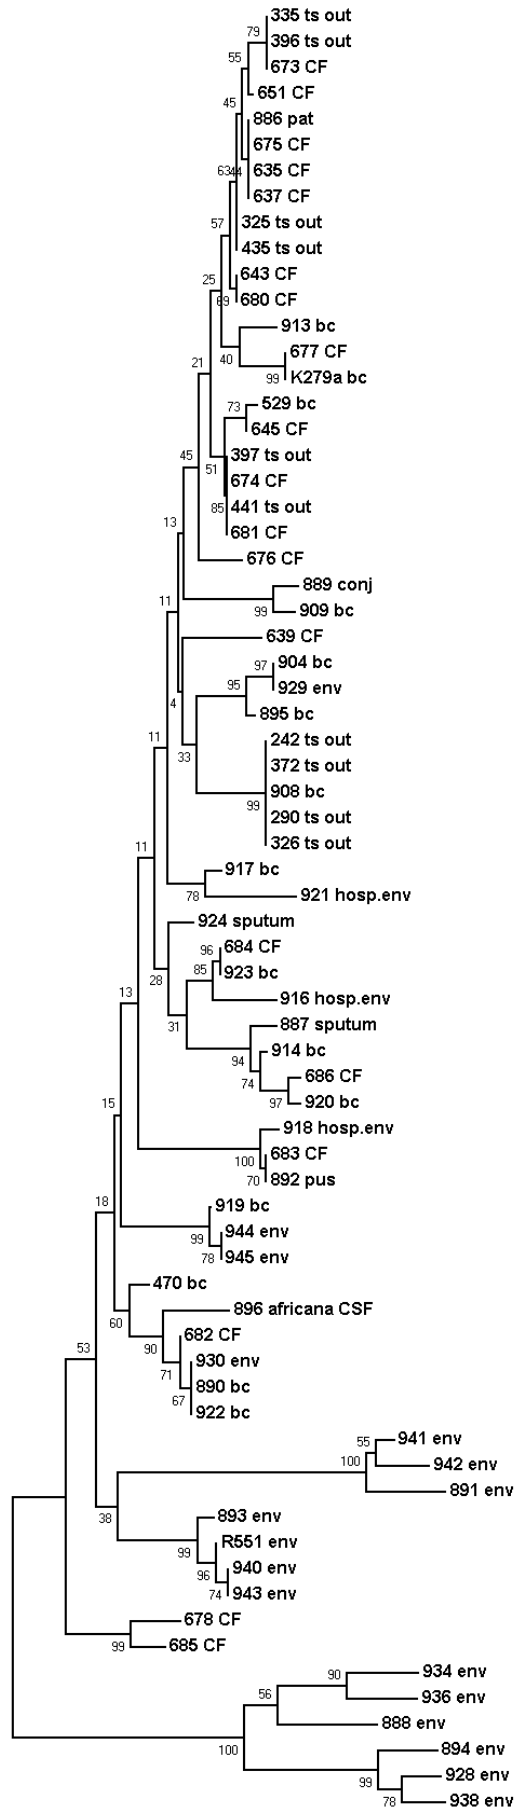

0.01

*recA*

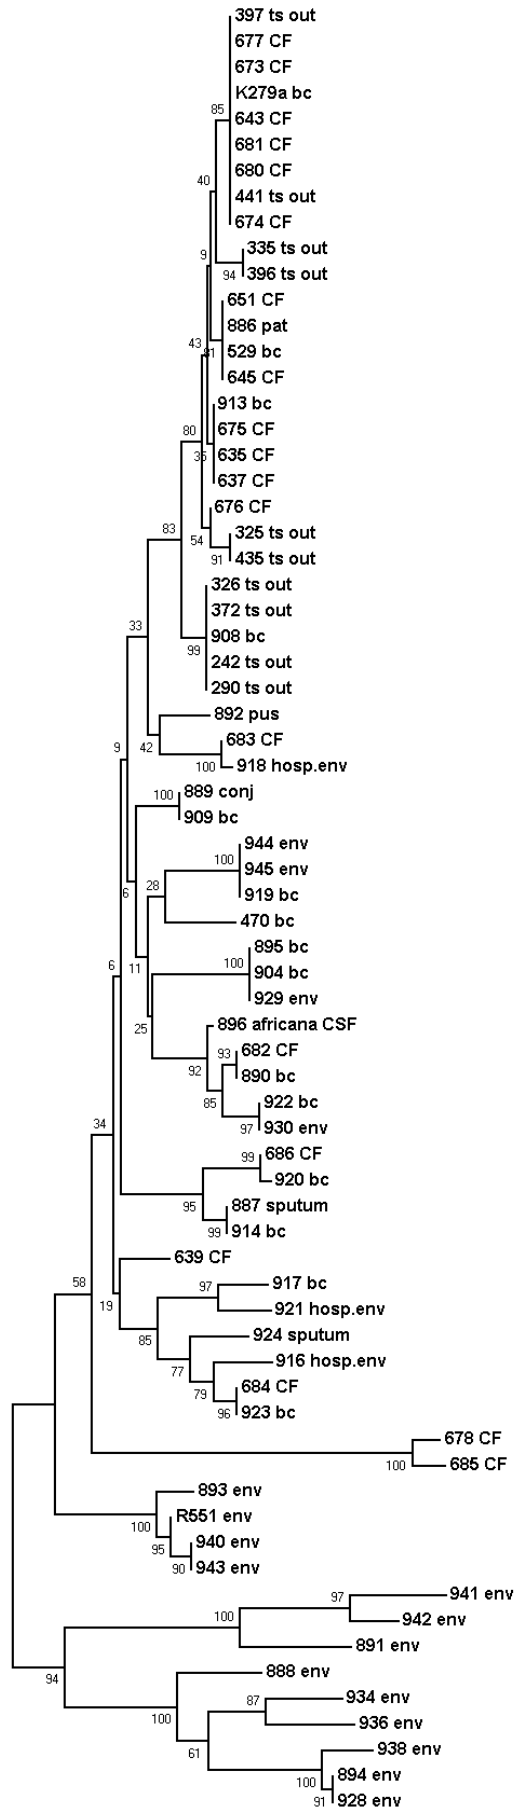

0.01
